# Supplementary material
Source: PubMed Central journal article supplement (PMC3328508)
Supplement: NIHMS365882-supplement-01.pdf [file NIHMS365882-supplement-01.pdf]

**Table 1. List of Diagnosis and Procedure Codes**

|                                                                        |                                                                         |
|------------------------------------------------------------------------|-------------------------------------------------------------------------|
| <b>Cataract extraction</b>                                             | 66830-66984                                                             |
| <b><u>Severe complications</u></b>                                     |                                                                         |
| Endophthalmitis                                                        | 360.0x                                                                  |
| Suprachoroidal hemorrhage                                              | 363.6x, 363.72                                                          |
| Tractional retinal detachment                                          | 361.81                                                                  |
| Rhegmatogenous retinal detachment                                      | 361.0, 361.0x                                                           |
| <b><u>Retina surgery</u></b>                                           |                                                                         |
| Vitrectomy                                                             | 65260, 65265, 66850, 66990, 67036,<br>67038, 67039, 67040, 67108, 67299 |
| Repair retinal detachment                                              | 67101, 67105, 67107, 67110, 67112,<br>67115, 67120                      |
| Vitreous Tap                                                           | 67015                                                                   |
| Intravitreal Injection                                                 | 67028                                                                   |
| Laser retinopexy                                                       | 67141, 67145                                                            |
| Panretinal photocoagulation                                            | 67228                                                                   |
| Focal laser                                                            | 67210                                                                   |
| <b><u>Intraocular surgery*</u></b>                                     |                                                                         |
| Enucleation / evisceration                                             | 65091, 65093, 65101, 65103, 65105                                       |
| Ruptured globe repair                                                  | 65270-65290                                                             |
| Keratoplasty                                                           | 65710-65755                                                             |
| Keratoprosthesis                                                       | 65770                                                                   |
| Corneal surgery to correct surgically<br>induced astigmatism           | 65772-65775                                                             |
| Paracentesis of anterior chamber with<br>removal vitreous, blood, etc. | 65800-65805, 65810, 65815                                               |
| Synechialysis (not including<br>goniosynechialysis)                    | 65870, 65875, 65880                                                     |
| Removal of epithelial downgrowth,<br>implanted material, blood clot    | 65900, 65920, 65930                                                     |
| Injection of air, liquid, or medications into<br>anterior chamber      | 66020, 66030                                                            |
| Trabeculectomy                                                         | 66150, 66155, 66160, 66165                                              |
| Incisional glaucoma surgery                                            | 66170, 66172, 66180                                                     |
| Wound revision major/minor                                             | 66250                                                                   |
| Surgical peripheral iridotomy (PI)                                     | 66500-66505                                                             |
| Repair iris                                                            | 66680, 66682                                                            |
| Intraocular lens (IOL) repositioning                                   | 66825                                                                   |
| Insertion of IOL (not associated with<br>cataract surgery)             | 66985                                                                   |
| IOL exchange                                                           | 66986                                                                   |
| Partial anterior vitrectomy                                            | 67005, 67010                                                            |

|                                                      |                                       |
|------------------------------------------------------|---------------------------------------|
| Injection medication into vitreous                   | 67025, 67027                          |
| <b>Co-morbid conditions</b>                          |                                       |
| Diabetes mellitus                                    | 250.xx                                |
| Background diabetic retinopathy                      | 362.01                                |
| Proliferative diabetic retinopathy                   | 362.02                                |
| Age-related macular degeneration                     | 362.5, 362.50, 362.51, 362.52, 362.57 |
| Macular hole                                         | 362.54                                |
| Epiretinal membrane                                  | 362.56                                |
| Trauma (ruptured globe and intraocular foreign body) | 871.0, 871.1, 871.2, 871.5, 871.6     |
| Panuveitis                                           | 360.12                                |
| Cataract                                             | 366.x                                 |
| <b>Less severe complication</b>                      |                                       |
| Choroidal detachment                                 | 363.7, 363.70, 363.71                 |
| Vitreous hemorrhage                                  | 362.81                                |
| Retinal edema                                        | 362.07, 362.53, 362.83                |
| Glaucoma                                             | 365.x                                 |
| Retinal tear                                         | 361.30, 361.31, 361.32, 361.33        |
| Hypotony                                             | 360.3, 360.30, 363.31, 363.32, 360.34 |
| Corneal edema                                        | 371.20, 371.21, 371.22, 371.23        |
| Recurrent corneal abrasion / erosion                 | 371.42                                |

\*Does not include retinal surgeries
